# Supplementary material
Source: PubMed Central journal article supplement (PMC3469055)
Supplement: cdd201255x3.pdf [file cdd201255x3.pdf]

| Amino-acids | 149             |                            | Species            | divergence on 25 Residues |
|-------------|-----------------|----------------------------|--------------------|---------------------------|
| YSESR       | <b>VEKD/G</b>   | LILTSRGPPTSFEFALAIVE       | Human              | 0                         |
| YSESR       | <b>VEKD/G</b>   | LILTSRGPPTSFEFALAIVE       | Taurus             | 0                         |
| YSENR       | <b>VEKD/G</b>   | LILTSRGPPTSFEFALAIVE       | Mus                | 0                         |
| YSESR       | <b>VEKD/G</b>   | LILTSRGPPTSFEFALAIVE       | Ratus              | 0                         |
| YSESR       | <b>VEKD/G</b>   | NILTSRGPPTSFEFGLAIVE       | Gallus             | 2                         |
| YSENR       | <b>VEKD/G</b>   | NLITSRGPPTSFEFGLAIE        | Crocodylus         | 5                         |
| YSEAR       | <b>VQKD/C</b>   | HLITSRGPPTSFEFALAIVE       | Salmon             | 5                         |
| YSEAR       | <b>VQKD/G</b>   | HYITSRGPPTSFEFALTIVE       | Medaka Japonica    | 5                         |
| LDDNV       | <b>V I SD/R</b> | V- ITSKGPGTAFEFALKIVE      | C Elegans          | 8                         |
| VDDKT       | <b>VVKD/G</b>   | NLITSRGPGTAYEFALKIAE       | Drosophila         | 9                         |
| DDITV       | <b>VDND/G</b>   | KI ITSRGPATALAFAYQIAE      | Lactobacillus      | 12                        |
| LEDQA       | <b>VVVD/C</b>   | VVTSKGPGTAMDFALTIE         | Nitrococcus oceani | 12                        |
|             | <b>VXXD/X</b>   | <b>XXTSXGPTGXXXFALXIXE</b> | <b>Consensus</b>   |                           |
