# Supplementary material
Source: PubMed Central journal article supplement (PMC3469055)

A

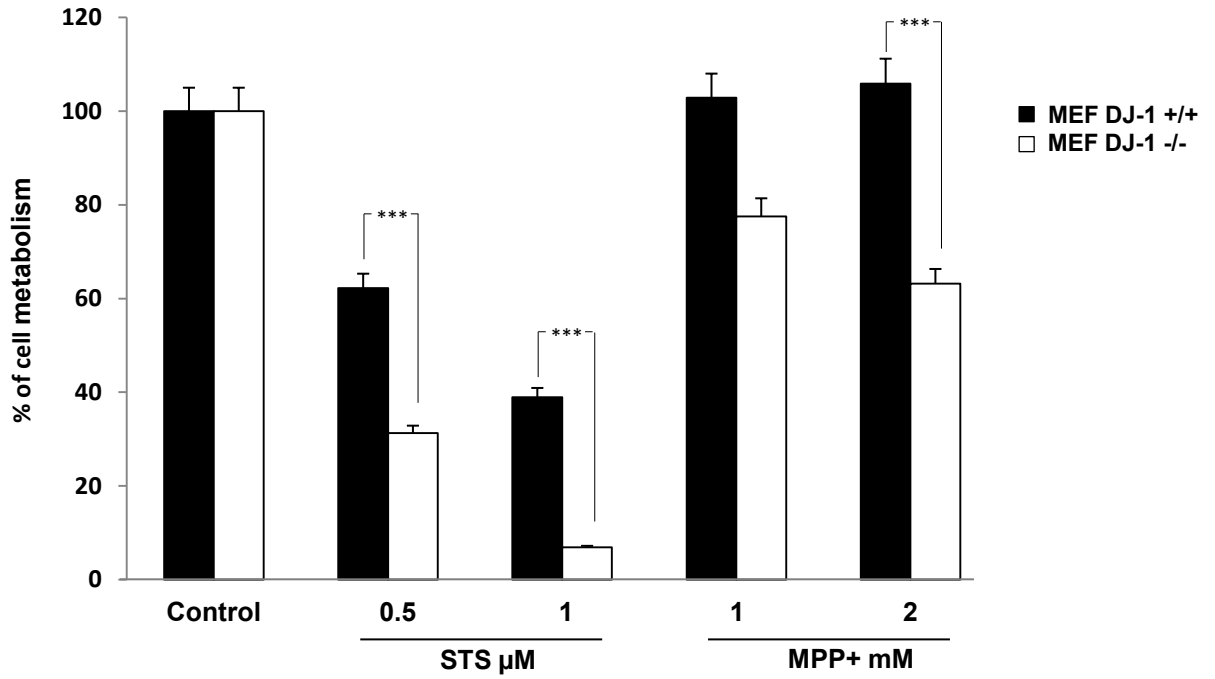

B

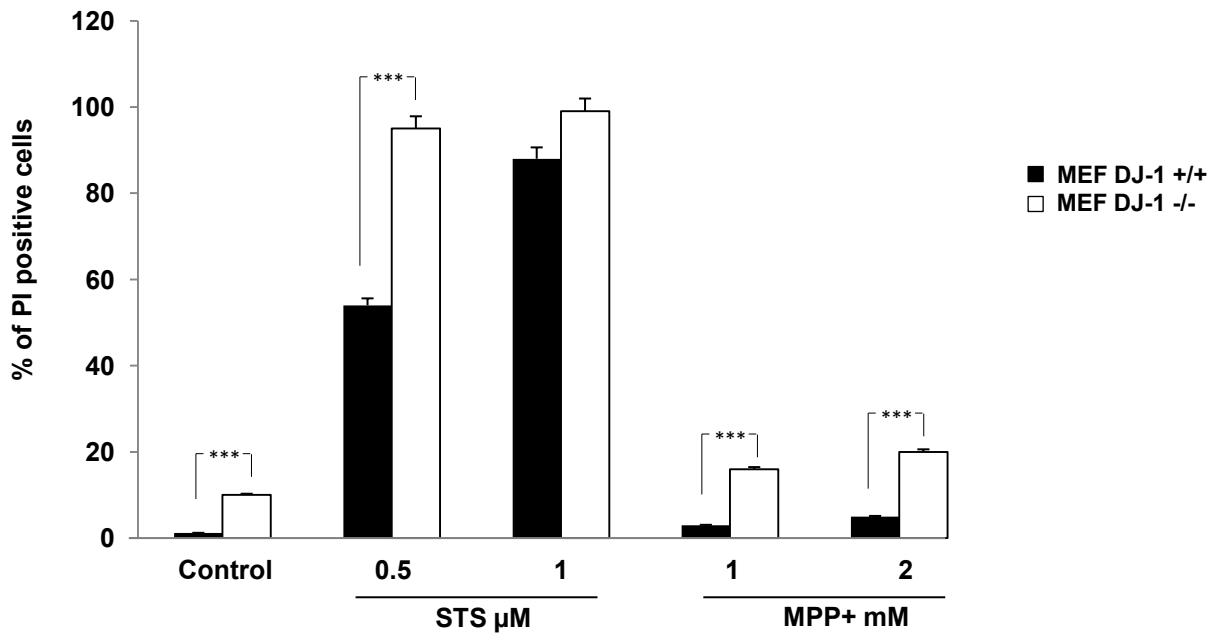

Supplement: cdd201255x1.pdf [file cdd201255x1.pdf]

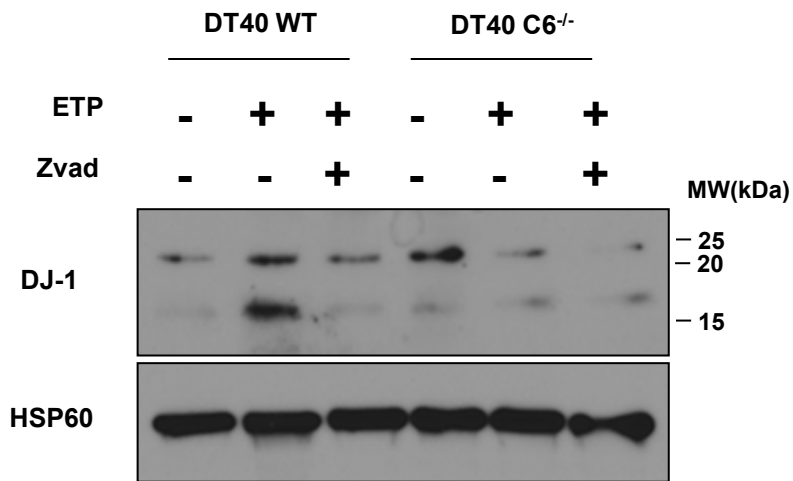

Supplement: cdd201255x2.pdf [file cdd201255x2.pdf]

A

Dapi

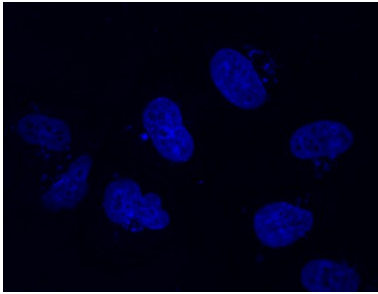

Dapi

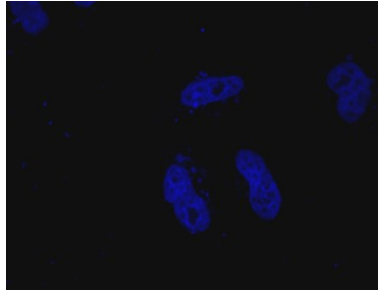

HSP60

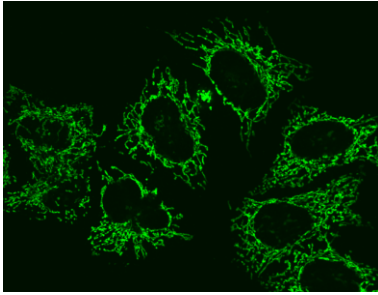

Calreticulin

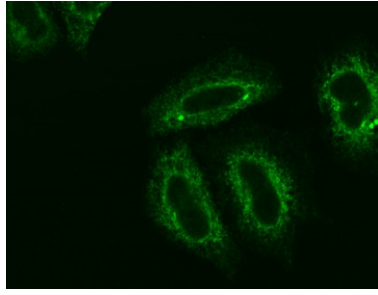

Myc

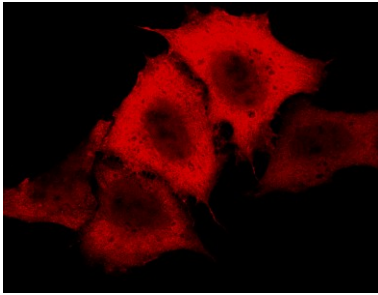

Myc

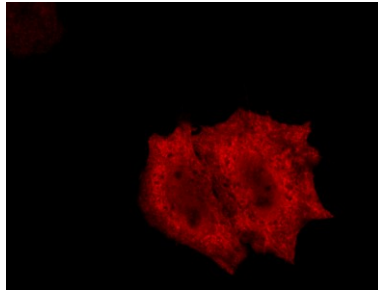

Merge

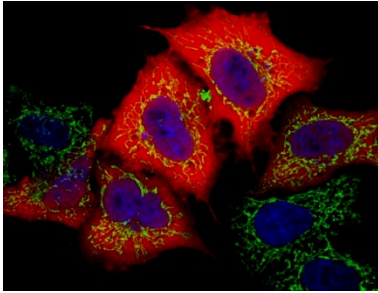

Merge

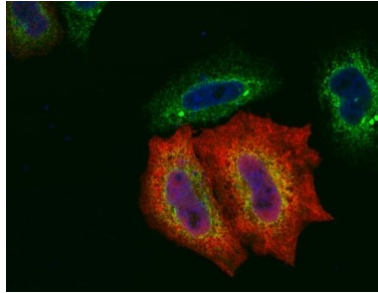

B

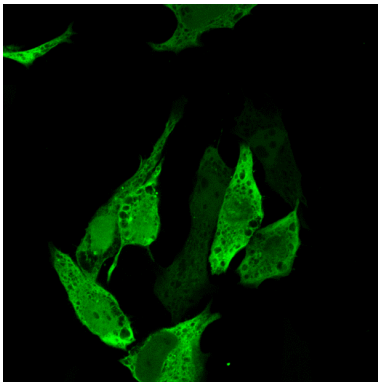

GFP-DJ-1

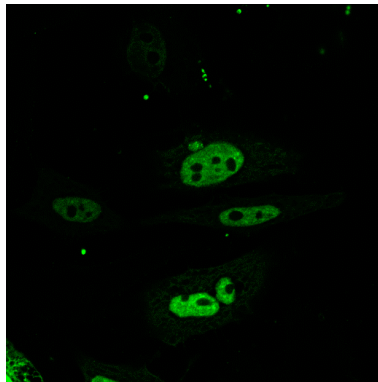

GFP-DJ-1Nt

Supplement: cdd201255x4.pdf [file cdd201255x4.pdf]

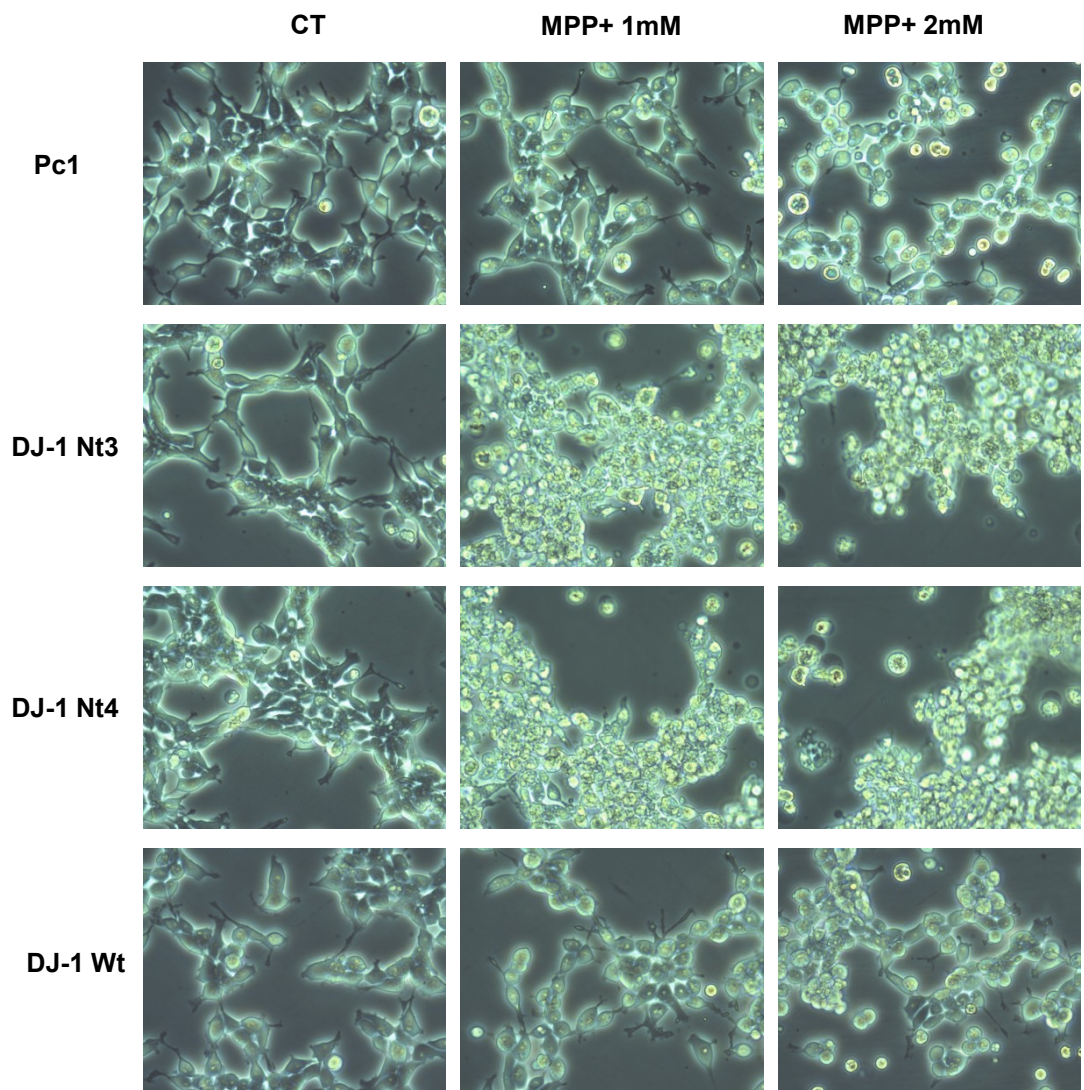

Supplement: cdd201255x5.pdf [file cdd201255x5.pdf]

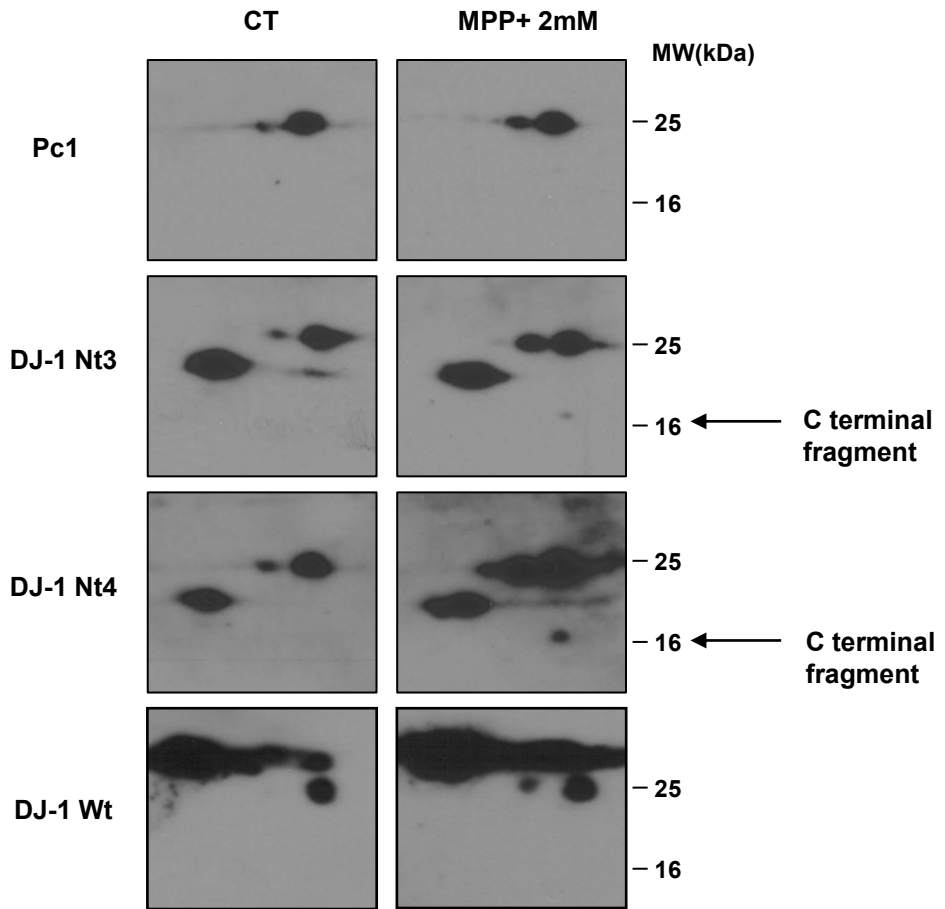

Supplement: cdd201255x6.pdf [file cdd201255x6.pdf]

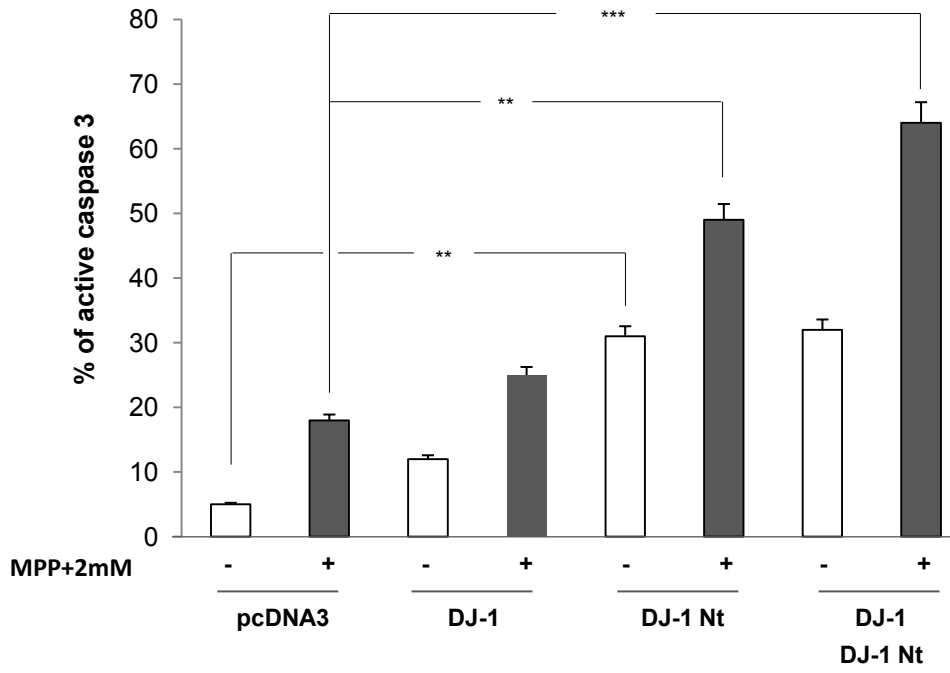

Supplement: cdd201255x7.pdf [file cdd201255x7.pdf]
